# Supplementary material for: Tumor angiogenesis targeting and imaging using gold nanoparticle probe with directly conjugated cyclic NGR
Source: Royal Society of Chemistry journal article supplement (doi:10.1039/c7ra10155d), 2018-01-01
Supplement: c7ra10155d1.pdf [file c7ra10155d1.pdf]

## Electronic supplementary information (ESI)

**Tumor Angiogenesis Targeting and CT Imaging Using Gold Nanoparticle **Probe** with  
Directly Conjugated cyclic NGR**

Minghao Wu<sup>#a</sup>, Yanyan Zhang<sup>#a</sup>, Ying Zhang<sup>a</sup>, Mingjie Wu<sup>b</sup>, Menglin Wu<sup>a</sup>, Hongyi Wu<sup>a</sup>,  
Lin Cao<sup>a</sup>, Liang Li<sup>a</sup>, Xue Li<sup>\*a</sup>, Xuening Zhang<sup>\*a</sup>

<sup>a</sup> Department of Medical Imaging, Second Hospital of Tianjin Medical University, Tianjin 300211, P. R. China

<sup>b</sup> Institut National de la Recherche Scientifique-Énergie Matériaux et Télécommunications, Varennes, Quebec, Canada J3X 1S2

# Authors who contributed equally to this work.

Corresponding authors:

\*Xuening Zhang, Tel:022-88329407. E-mail: luckyxn\_tianjin@163.com

\*Xue Li, Tel:022-88329407. E-mail: lx\_1229@163.com

**Figure S1** UV-visible absorption spectrum of the GNPs-PEG@cNGRs **probe** dispersed into PBS (A) and cell culture medium DMEM (B) with the increase of storage time for 120 days. Inset: pictures of the probes under different solvent conditions kept in 1.5 ml EP tube for 120 days.

**Figure S2** Hydrodynamic size distribution of the GNPs-PEG@cNGRs incubated with PBS (C) and cell culture medium DMEM (D) at 37 °C for 0 and 120 days.

**Figure S3** MTT viability assay of 293T cell after treatment with GNPs-PEG@cNGR at different concentration from 18.75 to 300  $\mu\text{g}/\text{mL}$  for 24 h.

**Figure S4** Biodistribution of the **probe** GNPs-PEG@cNGR (A) and GNPs-PEG (B) at 1, 2, 4, 8, and 24 h post injection.



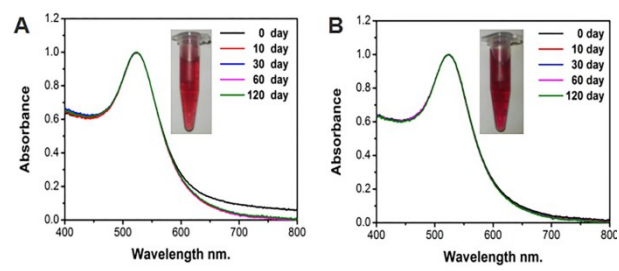

**Figure S1**

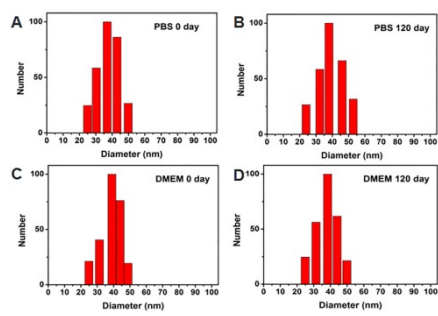

**Figure S2**



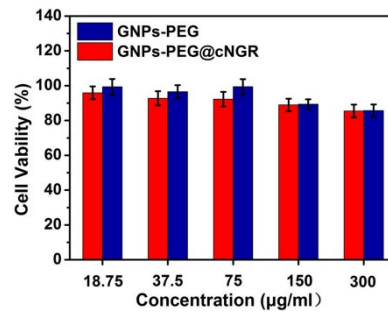

**Figure S3**

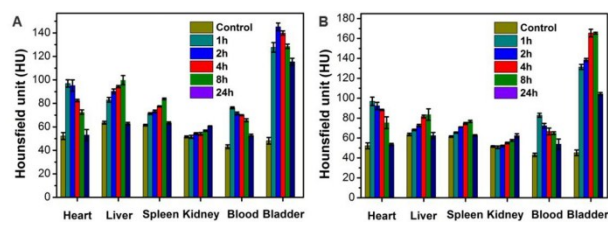

**Figure S4**
